# Supplementary material
Source: Springer Nature journal article supplement (https://www.springermedizin.de/resource/supplementary/12889_2014_6833_MOESM3_ESM.pdf/9499126)
Supplement: MOESM3 [file 9499126]

## Organisation level

## Practitioner level

## Client level

Context: supports or hinders...

Context: supports or hinders...

Context: supports or hinders...

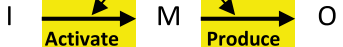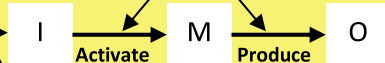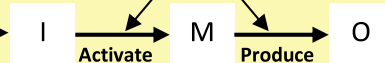

Outcomes influence contexts and interventions at the next level down
